# Supplementary material
Source: publisher figshare collection journal article supplement (https://springernature.figshare.com/ndownloader/files/7087280)
Supplement: Supplementary file 1 [file 7087280]

**Additional File 1: Tables S1-8** - Toomey and McGraw. The effects of sun exposure on carotenoid accumulation and oxidative stress in the retina of the house finch (*Haemorrhous mexicanus*)

Table S1. Mean  $\pm$  S.E. body mass of house finches in weeks 0, 4, and 8 of experiment 1.

| Sun exposure | Sex    | Mean $\pm$ S.E. body mass (g) |                           |                           |
|--------------|--------|-------------------------------|---------------------------|---------------------------|
|              |        | Week 0                        | Week 4                    | Week 8                    |
| High         | Male   | 18.1 $\pm$ 0.3<br>(n = 8)     | 19.2 $\pm$ 0.4<br>(n = 7) | 18.7 $\pm$ 0.3<br>(n = 7) |
|              | Female | 17.8 $\pm$ 0.2<br>(n = 5)     | 18.8 $\pm$ 0.3<br>(n = 6) | 18.3 $\pm$ 0.1<br>(n = 6) |
| Low          | Male   | 18.1 $\pm$ 0.4<br>(n = 8)     | 18.9 $\pm$ 0.4<br>(n = 8) | 18.5 $\pm$ 0.3<br>(n = 8) |
|              | Female | 17.6 $\pm$ 0.4<br>(n = 7)     | 18.9 $\pm$ 0.4<br>(n = 7) | 18.5 $\pm$ 0.4<br>(n = 7) |

Table S2. Mean  $\pm$  S.E. plasma carotenoid concentrations of house finches in weeks 0, 4, and 8 of experiment 1.

| Sun exposure | Sex    | Mean $\pm$ S.E. plasma carotenoid concentration ( $\mu\text{g ml}^{-1}$ ) |                           |                           |
|--------------|--------|---------------------------------------------------------------------------|---------------------------|---------------------------|
|              |        | Week 0                                                                    | Week 4                    | Week 8                    |
| High         | Male   | 15.6 $\pm$ 1.1<br>(n = 8)                                                 | 12.7 $\pm$ 0.8<br>(n = 7) | 15.9 $\pm$ 1.7<br>(n = 7) |
|              | Female | 13.0 $\pm$ 1.6<br>(n = 6)                                                 | 13.2 $\pm$ 1.3<br>(n = 6) | 16.6 $\pm$ 2.4<br>(n = 6) |
| Low          | Male   | 13.9 $\pm$ 1.3<br>(n = 8)                                                 | 12.1 $\pm$ 0.7<br>(n = 8) | 17.2 $\pm$ 2.0<br>(n = 8) |
|              | Female | 13.6 $\pm$ 1.1<br>(n = 7)                                                 | 10.3 $\pm$ 0.6<br>(n = 7) | 12.1 $\pm$ 0.6<br>(n = 7) |

Table S3. Mean  $\pm$  S.E. concentrations of retinal carotenoids in house finches at the conclusion of experiment 1.

| Sun exposure | Sex               | Mean $\pm$ carotenoid concentration ( $\mu\text{g retina}^{-1}$ ) |                 |                  |                  |                  |                      |
|--------------|-------------------|-------------------------------------------------------------------|-----------------|------------------|------------------|------------------|----------------------|
|              |                   | Astaxanthin                                                       | Galloxanthin    | Lutein           | Zeaxanthin       | Unknown          | $\epsilon$ -carotene |
| High         | Male<br>(n = 7)   | 0.34 $\pm$ 0.04                                                   | 0.29 $\pm$ 0.03 | 0.07 $\pm$ 0.006 | 0.08 $\pm$ 0.007 | 0.03 $\pm$ 0.002 | 0.02 $\pm$ 0.0002    |
|              | Female<br>(n = 6) | 0.3 $\pm$ 0.04                                                    | 0.39 $\pm$ 0.07 | 0.08 $\pm$ 0.007 | 0.08 $\pm$ 0.007 | 0.04 $\pm$ 0.002 | 0.02 $\pm$ 0.0002    |
| Low          | Male<br>(n = 8)   | 0.32 $\pm$ 0.03                                                   | 0.36 $\pm$ 0.04 | 0.08 $\pm$ 0.006 | 0.09 $\pm$ 0.006 | 0.04 $\pm$ 0.002 | 0.02 $\pm$ 0.0002    |
|              | Female<br>(n = 6) | 0.37 $\pm$ 0.03                                                   | 0.35 $\pm$ 0.05 | 0.07 $\pm$ 0.007 | 0.08 $\pm$ 0.01  | 0.04 $\pm$ 0.003 | 0.01 $\pm$ 0.0002    |

Table S4. Mean  $\pm$  S.E. levels of malondialdehyde (MDA) equivalents in the retinas of house finches at the conclusion of experiment 1.

| Sun exposure | Sex               | MDA<br>equivalents<br>(nmol mg <sup>-1</sup> ) |
|--------------|-------------------|------------------------------------------------|
| High         | Male<br>(n = 7)   | 8.0 $\pm$ 0.8                                  |
|              | Female<br>(n = 6) | 8.2 $\pm$ 1.1                                  |
| Low          | Male<br>(n = 7)   | 7.2 $\pm$ 1.0                                  |
|              | Female<br>(n = 6) | 6.8 $\pm$ 0.7                                  |

Table S5. Mean  $\pm$  S.E. body mass of house finches in weeks 0, 4, and 8 of experiment 2.

| Sun exposure | Diet       | Mean $\pm$ S.E. body mass (g) |                           |                           |
|--------------|------------|-------------------------------|---------------------------|---------------------------|
|              |            | Week 0                        | Week 4                    | Week 8                    |
| High         | Carotenoid | 18.8 $\pm$ 0.3<br>(n = 8)     | 18.7 $\pm$ 0.3<br>(n = 8) | 18.1 $\pm$ 0.4<br>(n = 5) |
|              | Control    | 19.1 $\pm$ 0.3<br>(n = 8)     | 18.5 $\pm$ 0.3<br>(n = 8) | 18 $\pm$ 0.5<br>(n = 5)   |
| Low          | Carotenoid | 19.2 $\pm$ 0.4<br>(n = 8)     | 18.8 $\pm$ 0.6<br>(n = 8) | 18.2 $\pm$ 0.5<br>(n = 8) |
|              | Control    | 18.5 $\pm$ 0.3<br>(n = 8)     | 18.2 $\pm$ 0.5<br>(n = 8) | 17.9 $\pm$ 0.4<br>(n = 8) |

Table S6. Mean  $\pm$  S.E. plasma carotenoid concentrations of house finches in weeks 0, 4, and 8 of experiment 2.

| Sun exposure | Diet       | Mean $\pm$ S.E. plasma carotenoid concentration ( $\mu\text{g ml}^{-1}$ ) |                           |                           |
|--------------|------------|---------------------------------------------------------------------------|---------------------------|---------------------------|
|              |            | Week 0                                                                    | Week 4                    | Week 8                    |
| High         | Carotenoid | 9.1 $\pm$ 1.1<br>(n = 8)                                                  | 14.4 $\pm$ 2.2<br>(n = 8) | 16.1 $\pm$ 1.5<br>(n = 5) |
|              | Control    | 7.3 $\pm$ 0.6<br>(n = 7)                                                  | 9.8 $\pm$ 1.4<br>(n = 7)  | 7 $\pm$ 1<br>(n = 5)      |
| Low          | Carotenoid | 10.2 $\pm$ 1.4<br>(n = 8)                                                 | 20.1 $\pm$ 4.3<br>(n = 8) | 20.2 $\pm$ 3.5<br>(n = 8) |
|              | Control    | 7.0 $\pm$ 0.4<br>(n = 8)                                                  | 7.1 $\pm$ 0.8<br>(n = 8)  | 8.5 $\pm$ 1.7<br>(n = 8)  |

Table S7. Mean  $\pm$  S.E. concentrations of retinal carotenoids in house finches at the conclusion of experiment 2.

| Sun exposure | Diet               | Mean $\pm$ carotenoid concentration ( $\mu\text{g retina}^{-1}$ ) |                    |                    |                    |                    |                      |
|--------------|--------------------|-------------------------------------------------------------------|--------------------|--------------------|--------------------|--------------------|----------------------|
|              |                    | Astaxanthin                                                       | Galloxanthin       | Lutein             | Zeaxanthin         | Unknown            | $\epsilon$ -carotene |
| High         | Carotenoid (n = 8) | 0.739 $\pm$ 0.0745                                                | 0.413 $\pm$ 0.0268 | 0.085 $\pm$ 0.008  | 0.12 $\pm$ 0.0076  | 0.041 $\pm$ 0.0021 | 0.017 $\pm$ 0.0004   |
|              | Control (n = 8)    | 0.663 $\pm$ 0.0468                                                | 0.382 $\pm$ 0.0331 | 0.077 $\pm$ 0.0055 | 0.097 $\pm$ 0.0075 | 0.043 $\pm$ 0.003  | 0.017 $\pm$ 0.0004   |
| Low          | Carotenoid (n = 8) | 0.652 $\pm$ 0.0334                                                | 0.539 $\pm$ 0.0412 | 0.078 $\pm$ 0.0042 | 0.13 $\pm$ 0.0091  | 0.045 $\pm$ 0.0035 | 0.018 $\pm$ 0.0004   |
|              | Control (n = 8)    | 0.613 $\pm$ 0.0304                                                | 0.381 $\pm$ 0.0693 | 0.076 $\pm$ 0.0047 | 0.089 $\pm$ 0.0104 | 0.049 $\pm$ 0.0066 | 0.017 $\pm$ 0.0005   |

Table S8. Mean  $\pm$  S.E. levels of malondialdehyde (MDA) equivalents in the retinas of house finches at the conclusion of experiment 2.

| Sun exposure | Diet               | MDA equivalents ( $\text{nmol mg}^{-1}$ ) |
|--------------|--------------------|-------------------------------------------|
| High         | Carotenoid (n = 5) | 6.7 $\pm$ 0.9                             |
|              | Control (n = 6)    | 6.9 $\pm$ 0.8                             |
| Low          | Carotenoid (n = 7) | 6.2 $\pm$ 0.6                             |
|              | Control (n = 7)    | 6.5 $\pm$ 0.6                             |
